# Supplementary material
Source: MDPI journal article supplement (https://www.mdpi.com/1996-1073/17/6/1480)
Supplement: s1 [file s1]

Supplementary Materials: Results

1. Scenario 1: VRE 30% (Solar: Wind = 1:1)

Table S1.1: No Residual Demand Duration

|                   | No Residual Demand Duration [hrs] |
|-------------------|-----------------------------------|
| VE Venezuela      | 8733                              |
| CO Colombia       | 8731                              |
| BR Brazil         | 8726                              |
| MZ Mozambique     | 8721                              |
| PY Paraguay       | 8711                              |
| CA Canada         | 3720                              |
| NZ New Zealand    | 2934                              |
| SD Sudan          | 2465                              |
| PE Peru           | 2231                              |
| GH Ghana          | 1051                              |
| SE Sweden         | 806                               |
| MY Malaysia       | 327                               |
| VN Vietnam        | 321                               |
| AR Argentina      | 285                               |
| IT Italy          | 164                               |
| TR Turkey         | 136                               |
| CL Chile          | 133                               |
| ES Spain          | 91                                |
| JP Japan          | 61                                |
| KR South Korea    | 59                                |
| NG Nigeria        | 48                                |
| FR France         | 35                                |
| TH Thailand       | 18                                |
| DE Germany        | 11                                |
| UA Ukraine        | 10                                |
| PL Poland         | 9                                 |
| TN Tunisia        | 6                                 |
| ID Indonesia      | 5                                 |
| CN China          | 4                                 |
| DZ Algeria        | 4                                 |
| GB United Kingdom | 2                                 |
| MA Morocco        | 1                                 |
| AU Australia      | 0                                 |
| EG Egypt          | 0                                 |
| IN India          | 0                                 |
| IR Iran           | 0                                 |
| LY Libya          | 0                                 |
| MX Mexico         | 0                                 |
| RU Russia         | 0                                 |
| SA Saudi Arabia   | 0                                 |
| US United States  | 0                                 |
| ZA South Africa   | 0                                 |

Table S1.2: Curtailed VRE Energy

|                   | Curtailed E [normalized] | Curtailed E [GWh] |
|-------------------|--------------------------|-------------------|
| MY Malaysia       | 19.236                   | 321.927           |
| SE Sweden         | 14.067                   | 212.558           |
| KR South Korea    | 5.275                    | 326.919           |
| AR Argentina      | 4.701                    | 67.288            |
| CL Chile          | 4.426                    | 38.918            |
| CO Colombia       | 4.219                    | 34.261            |
| GH Ghana          | 3.802                    | 5.463             |
| PY Paraguay       | 1.859                    | 2.659             |
| IT Italy          | 1.758                    | 61.452            |
| MA Morocco        | 0.931                    | 3.337             |
| JP Japan          | 0.816                    | 89.824            |
| NG Nigeria        | 0.530                    | 1.625             |
| DZ Algeria        | 0.466                    | 3.301             |
| TR Turkey         | 0.412                    | 10.496            |
| ES Spain          | 0.381                    | 10.747            |
| PL Poland         | 0.213                    | 3.702             |
| TN Tunisia        | 0.204                    | 0.368             |
| VN Vietnam        | 0.203                    | 4.537             |
| FR France         | 0.178                    | 9.198             |
| DE Germany        | 0.146                    | 8.882             |
| GB United Kingdom | 0.136                    | 4.859             |
| TH Thailand       | 0.122                    | 2.716             |
| NZ New Zealand    | 0.120                    | 0.555             |
| SD Sudan          | 0.106                    | 0.156             |
| ZA South Africa   | 0.043                    | 1.022             |
| AU Australia      | 0.000                    | 0.000             |
| BR Brazil         | 0.000                    | 0.000             |
| CA Canada         | 0.000                    | 0.000             |
| CN China          | 0.000                    | 0.000             |
| EG Egypt          | 0.000                    | 0.000             |
| ID Indonesia      | 0.000                    | 0.000             |
| IN India          | 0.000                    | 0.000             |
| IR Iran           | 0.000                    | 0.000             |
| LY Libya          | 0.000                    | 0.000             |
| MX Mexico         | 0.000                    | 0.000             |
| MZ Mozambique     | 0.000                    | 0.000             |
| PE Peru           | 0.000                    | 0.000             |
| RU Russia         | 0.000                    | 0.000             |
| SA Saudi Arabia   | 0.000                    | 0.000             |
| UA Ukraine        | 0.000                    | 0.000             |
| US United States  | 0.000                    | 0.000             |
| VE Venezuela      | 0.000                    | 0.000             |

Table S1.3: VRE Total Installed Capacity

|                   | Capacity<br>[normalized] | Capacity<br>[GW] |
|-------------------|--------------------------|------------------|
| MY Malaysia       | 1.490                    | 24.930           |
| SE Sweden         | 1.159                    | 17.510           |
| CO Colombia       | 1.152                    | 9.358            |
| TH Thailand       | 1.129                    | 25.106           |
| KR South Korea    | 1.120                    | 69.383           |
| VN Vietnam        | 1.114                    | 24.890           |
| GH Ghana          | 1.107                    | 1.591            |
| IT Italy          | 1.091                    | 38.153           |
| NG Nigeria        | 1.031                    | 3.162            |
| VE Venezuela      | 0.984                    | 7.332            |
| ES Spain          | 0.970                    | 27.408           |
| TR Turkey         | 0.962                    | 24.534           |
| PL Poland         | 0.962                    | 16.681           |
| IN India          | 0.941                    | 140.974          |
| PE Peru           | 0.937                    | 5.212            |
| ID Indonesia      | 0.931                    | 26.277           |
| JP Japan          | 0.929                    | 102.185          |
| MZ Mozambique     | 0.921                    | 1.341            |
| PY Paraguay       | 0.919                    | 1.315            |
| MX Mexico         | 0.915                    | 30.427           |
| TN Tunisia        | 0.901                    | 1.628            |
| UA Ukraine        | 0.900                    | 13.063           |
| NZ New Zealand    | 0.894                    | 4.131            |
| DE Germany        | 0.888                    | 53.962           |
| FR France         | 0.840                    | 43.312           |
| BR Brazil         | 0.792                    | 48.041           |
| ZA South Africa   | 0.781                    | 18.573           |
| DZ Algeria        | 0.770                    | 5.461            |
| SD Sudan          | 0.767                    | 1.128            |
| GB United Kingdom | 0.764                    | 27.358           |
| IR Iran           | 0.760                    | 23.566           |
| SA Saudi Arabia   | 0.759                    | 28.650           |
| EG Egypt          | 0.755                    | 14.180           |
| US United States  | 0.743                    | 342.208          |
| MA Morocco        | 0.740                    | 2.653            |
| CN China          | 0.716                    | 526.968          |
| CA Canada         | 0.680                    | 43.002           |
| AU Australia      | 0.673                    | 18.351           |
| CL Chile          | 0.673                    | 5.915            |
| AR Argentina      | 0.664                    | 9.510            |
| RU Russia         | 0.653                    | 69.428           |
| LY Libya          | 0.630                    | 1.848            |

Table S1.4: Peak Residual Demand

|                   | Peak<br>Demand<br>[normalized] | Peak<br>Demand<br>[GW] |
|-------------------|--------------------------------|------------------------|
| FR France         | 1.515                          | 78.075                 |
| TN Tunisia        | 1.476                          | 2.667                  |
| GB United Kingdom | 1.474                          | 52.784                 |
| DZ Algeria        | 1.465                          | 10.386                 |
| LY Libya          | 1.439                          | 4.220                  |
| SE Sweden         | 1.417                          | 21.417                 |
| SA Saudi Arabia   | 1.397                          | 52.705                 |
| JP Japan          | 1.389                          | 152.888                |
| ES Spain          | 1.340                          | 37.854                 |
| EG Egypt          | 1.331                          | 25.008                 |
| DE Germany        | 1.328                          | 80.696                 |
| PL Poland         | 1.314                          | 22.783                 |
| IT Italy          | 1.278                          | 44.672                 |
| TH Thailand       | 1.273                          | 28.315                 |
| MA Morocco        | 1.268                          | 4.543                  |
| PY Paraguay       | 1.257                          | 1.798                  |
| ID Indonesia      | 1.239                          | 34.970                 |
| NG Nigeria        | 1.225                          | 3.754                  |
| IR Iran           | 1.221                          | 37.845                 |
| KR South Korea    | 1.220                          | 75.627                 |
| MY Malaysia       | 1.209                          | 20.241                 |
| UA Ukraine        | 1.205                          | 17.498                 |
| AU Australia      | 1.205                          | 32.866                 |
| AR Argentina      | 1.204                          | 17.241                 |
| ZA South Africa   | 1.194                          | 28.388                 |
| US United States  | 1.177                          | 541.862                |
| IN India          | 1.134                          | 169.920                |
| GH Ghana          | 1.106                          | 1.589                  |
| MX Mexico         | 1.085                          | 36.078                 |
| CO Colombia       | 1.070                          | 8.686                  |
| PE Peru           | 1.048                          | 5.833                  |
| TR Turkey         | 1.047                          | 26.692                 |
| RU Russia         | 1.035                          | 110.075                |
| VN Vietnam        | 1.031                          | 23.029                 |
| VE Venezuela      | 1.030                          | 7.674                  |
| CL Chile          | 1.024                          | 9.008                  |
| CN China          | 0.929                          | 684.051                |
| CA Canada         | 0.913                          | 57.766                 |
| BR Brazil         | 0.826                          | 50.077                 |
| NZ New Zealand    | 0.751                          | 3.469                  |
| MZ Mozambique     | 0.543                          | 0.791                  |
| SD Sudan          | 0.291                          | 0.428                  |

Table S1.5: Max Hourly Ramp Up Rate

|                   | Ramp Rate<br>[normalized] | Ramp<br>Rate<br>[GW/hr] |
|-------------------|---------------------------|-------------------------|
| TN Tunisia        | 0.306                     | 0.554                   |
| MY Malaysia       | 0.281                     | 4.702                   |
| MA Morocco        | 0.264                     | 0.947                   |
| KR South Korea    | 0.264                     | 16.372                  |
| NG Nigeria        | 0.256                     | 0.784                   |
| TH Thailand       | 0.245                     | 5.454                   |
| MX Mexico         | 0.236                     | 7.861                   |
| GB United Kingdom | 0.235                     | 8.420                   |
| IN India          | 0.231                     | 34.575                  |
| IR Iran           | 0.230                     | 7.119                   |
| JP Japan          | 0.227                     | 24.946                  |
| LY Libya          | 0.225                     | 0.661                   |
| ZA South Africa   | 0.222                     | 5.274                   |
| PL Poland         | 0.220                     | 3.818                   |
| FR France         | 0.216                     | 11.142                  |
| ID Indonesia      | 0.210                     | 5.920                   |
| DZ Algeria        | 0.208                     | 1.474                   |
| UA Ukraine        | 0.204                     | 2.963                   |
| SA Saudi Arabia   | 0.196                     | 7.392                   |
| CN China          | 0.193                     | 141.802                 |
| IT Italy          | 0.187                     | 6.545                   |
| DE Germany        | 0.187                     | 11.372                  |
| EG Egypt          | 0.187                     | 3.511                   |
| ES Spain          | 0.184                     | 5.194                   |
| TR Turkey         | 0.180                     | 4.602                   |
| VN Vietnam        | 0.165                     | 3.680                   |
| US United States  | 0.164                     | 75.463                  |
| AR Argentina      | 0.162                     | 2.325                   |
| AU Australia      | 0.152                     | 4.132                   |
| CL Chile          | 0.124                     | 1.088                   |
| GH Ghana          | 0.101                     | 0.146                   |
| SE Sweden         | 0.089                     | 1.338                   |
| MZ Mozambique     | 0.084                     | 0.123                   |
| NZ New Zealand    | 0.074                     | 0.340                   |
| PE Peru           | 0.064                     | 0.358                   |
| SD Sudan          | 0.057                     | 0.083                   |
| RU Russia         | 0.047                     | 5.014                   |
| CA Canada         | 0.007                     | 0.421                   |
| BR Brazil         | 0.000                     | 0.000                   |
| CO Colombia       | 0.000                     | 0.000                   |
| PY Paraguay       | 0.000                     | 0.000                   |
| VE Venezuela      | 0.000                     | 0.000                   |

Table S1.6: Max Hourly Ramp Down Rate

|                   | Ramp Rate<br>[normalized] | Ramp<br>Rate<br>[GW/hr] |
|-------------------|---------------------------|-------------------------|
| GH Ghana          | -0.382                    | -0.549                  |
| MY Malaysia       | -0.310                    | -5.182                  |
| TH Thailand       | -0.285                    | -6.342                  |
| KR South Korea    | -0.279                    | -17.294                 |
| SE Sweden         | -0.256                    | -3.861                  |
| NG Nigeria        | -0.255                    | -0.782                  |
| GB United Kingdom | -0.240                    | -8.599                  |
| TN Tunisia        | -0.237                    | -0.428                  |
| ES Spain          | -0.235                    | -6.630                  |
| IT Italy          | -0.219                    | -7.650                  |
| PL Poland         | -0.219                    | -3.792                  |
| VN Vietnam        | -0.217                    | -4.859                  |
| IN India          | -0.212                    | -31.709                 |
| PE Peru           | -0.211                    | -1.173                  |
| MA Morocco        | -0.202                    | -0.724                  |
| UA Ukraine        | -0.201                    | -2.913                  |
| MX Mexico         | -0.199                    | -6.630                  |
| EG Egypt          | -0.198                    | -3.712                  |
| ID Indonesia      | -0.196                    | -5.521                  |
| ZA South Africa   | -0.182                    | -4.328                  |
| DE Germany        | -0.179                    | -10.888                 |
| FR France         | -0.173                    | -8.921                  |
| CL Chile          | -0.172                    | -1.515                  |
| AU Australia      | -0.170                    | -4.631                  |
| CN China          | -0.169                    | -124.629                |
| DZ Algeria        | -0.168                    | -1.193                  |
| LY Libya          | -0.168                    | -0.493                  |
| AR Argentina      | -0.165                    | -2.362                  |
| TR Turkey         | -0.162                    | -4.137                  |
| JP Japan          | -0.161                    | -17.684                 |
| BR Brazil         | -0.161                    | -9.737                  |
| US United States  | -0.157                    | -72.078                 |
| VE Venezuela      | -0.149                    | -1.107                  |
| IR Iran           | -0.147                    | -4.559                  |
| SD Sudan          | -0.146                    | -0.214                  |
| SA Saudi Arabia   | -0.142                    | -5.357                  |
| PY Paraguay       | -0.130                    | -0.186                  |
| NZ New Zealand    | -0.120                    | -0.556                  |
| MZ Mozambique     | -0.116                    | -0.169                  |
| CO Colombia       | -0.116                    | -0.939                  |
| RU Russia         | -0.062                    | -6.557                  |
| CA Canada         | -0.050                    | -3.183                  |

Table S1.7: Sum of Hourly Ramp Up Rates

|                   | Ramp Rate<br>Sum<br>[normalized] | Ramp<br>Rate Sum<br>[GW/hr] |
|-------------------|----------------------------------|-----------------------------|
| MY Malaysia       | 365.0                            | 6108.5                      |
| GH Ghana          | 330.3                            | 474.6                       |
| ID Indonesia      | 296.9                            | 8379.9                      |
| NG Nigeria        | 294.4                            | 902.5                       |
| TH Thailand       | 275.7                            | 6130.2                      |
| IT Italy          | 269.0                            | 9406.7                      |
| GB United Kingdom | 229.3                            | 8210.7                      |
| VN Vietnam        | 223.0                            | 4983.2                      |
| LY Libya          | 219.5                            | 643.8                       |
| MA Morocco        | 216.8                            | 776.8                       |
| TN Tunisia        | 216.7                            | 391.7                       |
| IN India          | 215.4                            | 32278.6                     |
| ES Spain          | 213.4                            | 6026.0                      |
| EG Egypt          | 209.2                            | 3929.3                      |
| DZ Algeria        | 209.0                            | 1481.7                      |
| PL Poland         | 192.6                            | 3340.7                      |
| JP Japan          | 185.7                            | 20439.5                     |
| FR France         | 183.5                            | 9457.6                      |
| KR South Korea    | 179.1                            | 11098.7                     |
| DE Germany        | 177.5                            | 10785.5                     |
| ZA South Africa   | 175.9                            | 4179.9                      |
| AR Argentina      | 175.1                            | 2506.7                      |
| MX Mexico         | 174.9                            | 5813.8                      |
| CN China          | 174.7                            | 128606.5                    |
| TR Turkey         | 168.1                            | 4285.3                      |
| CL Chile          | 163.6                            | 1438.2                      |
| UA Ukraine        | 158.5                            | 2300.9                      |
| SE Sweden         | 152.9                            | 2310.2                      |
| US United States  | 151.3                            | 69633.2                     |
| IR Iran           | 149.1                            | 4619.9                      |
| AU Australia      | 134.7                            | 3675.1                      |
| SA Saudi Arabia   | 133.5                            | 5038.4                      |
| PE Peru           | 112.3                            | 624.9                       |
| NZ New Zealand    | 102.7                            | 474.7                       |
| SD Sudan          | 82.5                             | 121.3                       |
| RU Russia         | 72.0                             | 7658.8                      |
| CA Canada         | 22.8                             | 1441.8                      |
| MZ Mozambique     | 0.4                              | 0.6                         |
| BR Brazil         | 0.0                              | 0.0                         |
| CO Colombia       | 0.0                              | 0.0                         |
| PY Paraguay       | 0.0                              | 0.0                         |
| VE Venezuela      | 0.0                              | 0.0                         |

Table S1.8: Sum of Hourly Ramp Down Rates

|                   | Ramp Rate<br>Sum<br>[normalized] | Ramp<br>Rate Sum<br>[GW/hr] |
|-------------------|----------------------------------|-----------------------------|
| MY Malaysia       | -365.1                           | -6110.0                     |
| GH Ghana          | -330.4                           | -474.8                      |
| ID Indonesia      | -297.1                           | -8387.3                     |
| NG Nigeria        | -294.5                           | -902.7                      |
| TH Thailand       | -276.0                           | -6135.8                     |
| IT Italy          | -269.2                           | -9414.3                     |
| GB United Kingdom | -229.5                           | -8215.8                     |
| VN Vietnam        | -223.4                           | -4992.3                     |
| LY Libya          | -219.5                           | -643.8                      |
| MA Morocco        | -217.0                           | -777.5                      |
| TN Tunisia        | -216.7                           | -391.7                      |
| IN India          | -215.7                           | -32312.0                    |
| ES Spain          | -213.3                           | -6025.2                     |
| EG Egypt          | -209.2                           | -3929.9                     |
| DZ Algeria        | -209.0                           | -1481.8                     |
| PL Poland         | -192.6                           | -3341.3                     |
| JP Japan          | -185.9                           | -20460.5                    |
| FR France         | -183.5                           | -9455.7                     |
| KR South Korea    | -179.0                           | -11094.0                    |
| DE Germany        | -177.6                           | -10788.3                    |
| ZA South Africa   | -175.7                           | -4176.8                     |
| AR Argentina      | -175.3                           | -2509.3                     |
| MX Mexico         | -175.1                           | -5818.6                     |
| CN China          | -175.0                           | -128892.2                   |
| TR Turkey         | -168.7                           | -4300.3                     |
| CL Chile          | -163.8                           | -1440.4                     |
| UA Ukraine        | -158.8                           | -2304.5                     |
| SE Sweden         | -153.6                           | -2320.6                     |
| US United States  | -151.8                           | -69870.5                    |
| IR Iran           | -149.2                           | -4622.1                     |
| AU Australia      | -135.0                           | -3682.3                     |
| SA Saudi Arabia   | -133.5                           | -5035.7                     |
| PE Peru           | -113.1                           | -629.1                      |
| NZ New Zealand    | -103.3                           | -477.3                      |
| SD Sudan          | -82.7                            | -121.6                      |
| RU Russia         | -72.4                            | -7696.5                     |
| CA Canada         | -23.7                            | -1497.3                     |
| PY Paraguay       | -1.3                             | -1.8                        |
| CO Colombia       | -1.1                             | -8.9                        |
| VE Venezuela      | -1.1                             | -8.1                        |
| MZ Mozambique     | -0.9                             | -1.4                        |
| BR Brazil         | -0.8                             | -51.5                       |

2. Scenario 2: VRE 50% (Solar: Wind = 1:1)

Table S2.1: No Residual Demand Duration

|                   | No Residual Demand Duration [hrs] |
|-------------------|-----------------------------------|
| MZ Mozambique     | 8752                              |
| BR Brazil         | 8749                              |
| VE Venezuela      | 8747                              |
| CO Colombia       | 8746                              |
| PY Paraguay       | 8734                              |
| CA Canada         | 8686                              |
| SD Sudan          | 8655                              |
| NZ New Zealand    | 8637                              |
| PE Peru           | 6998                              |
| SE Sweden         | 3809                              |
| GH Ghana          | 3394                              |
| MY Malaysia       | 2814                              |
| VN Vietnam        | 2145                              |
| ID Indonesia      | 2115                              |
| AR Argentina      | 1595                              |
| NG Nigeria        | 1414                              |
| CL Chile          | 1342                              |
| TR Turkey         | 1341                              |
| IT Italy          | 1326                              |
| KR South Korea    | 983                               |
| TH Thailand       | 974                               |
| CN China          | 963                               |
| JP Japan          | 935                               |
| ES Spain          | 791                               |
| PL Poland         | 634                               |
| FR France         | 618                               |
| TN Tunisia        | 602                               |
| IN India          | 565                               |
| UA Ukraine        | 517                               |
| MX Mexico         | 504                               |
| DE Germany        | 491                               |
| DZ Algeria        | 488                               |
| ZA South Africa   | 478                               |
| GB United Kingdom | 412                               |
| SA Saudi Arabia   | 391                               |
| US United States  | 352                               |
| MA Morocco        | 311                               |
| IR Iran           | 279                               |
| RU Russia         | 258                               |
| LY Libya          | 218                               |
| AU Australia      | 204                               |
| EG Egypt          | 169                               |

Table S2.2: Curtailed VRE Energy

|                   | Curtailed E [normalized] | Curtailed E [GWh] |
|-------------------|--------------------------|-------------------|
| MY Malaysia       | 1688.25                  | 28254             |
| PE Peru           | 1677.08                  | 9331              |
| CO Colombia       | 504.30                   | 4095              |
| SE Sweden         | 502.14                   | 7587              |
| ID Indonesia      | 407.28                   | 11496             |
| PY Paraguay       | 250.08                   | 358               |
| KR South Korea    | 244.98                   | 15183             |
| GH Ghana          | 232.86                   | 335               |
| IT Italy          | 191.01                   | 6679              |
| VN Vietnam        | 179.32                   | 4006              |
| VE Venezuela      | 174.38                   | 1299              |
| TH Thailand       | 171.20                   | 3806              |
| JP Japan          | 133.48                   | 14688             |
| NG Nigeria        | 110.48                   | 339               |
| ES Spain          | 97.73                    | 2760              |
| TN Tunisia        | 91.59                    | 166               |
| PL Poland         | 78.02                    | 1353              |
| TR Turkey         | 77.03                    | 1964              |
| UA Ukraine        | 65.90                    | 956               |
| FR France         | 59.17                    | 3049              |
| BR Brazil         | 56.67                    | 3436              |
| DE Germany        | 55.23                    | 3356              |
| ZA South Africa   | 53.81                    | 1279              |
| DZ Algeria        | 50.55                    | 358               |
| NZ New Zealand    | 49.08                    | 227               |
| MZ Mozambique     | 47.24                    | 69                |
| MX Mexico         | 44.33                    | 1474              |
| GB United Kingdom | 42.95                    | 1538              |
| SA Saudi Arabia   | 39.65                    | 1496              |
| CL Chile          | 34.25                    | 301               |
| AR Argentina      | 33.74                    | 483               |
| SD Sudan          | 29.42                    | 43                |
| IN India          | 26.55                    | 3978              |
| MA Morocco        | 20.97                    | 75                |
| US United States  | 19.92                    | 9170              |
| CA Canada         | 19.80                    | 1253              |
| CN China          | 17.91                    | 13191             |
| IR Iran           | 12.07                    | 374               |
| LY Libya          | 11.76                    | 34                |
| AU Australia      | 7.44                     | 203               |
| EG Egypt          | 5.19                     | 98                |
| RU Russia         | 2.64                     | 280               |

Table S2.3: VRE Total Installed Capacity

|                   | Capacity<br>[normalized] | Capacity<br>[GW] |
|-------------------|--------------------------|------------------|
| MY Malaysia       | 3.415                    | 57.147           |
| PE Peru           | 2.159                    | 12.012           |
| SE Sweden         | 2.141                    | 32.356           |
| CO Colombia       | 2.138                    | 17.364           |
| KR South Korea    | 1.966                    | 121.862          |
| TH Thailand       | 1.955                    | 43.476           |
| GH Ghana          | 1.941                    | 2.789            |
| VN Vietnam        | 1.933                    | 43.178           |
| IT Italy          | 1.897                    | 66.317           |
| NG Nigeria        | 1.762                    | 5.401            |
| VE Venezuela      | 1.706                    | 12.706           |
| ID Indonesia      | 1.696                    | 47.867           |
| ES Spain          | 1.653                    | 46.692           |
| TR Turkey         | 1.632                    | 41.602           |
| PL Poland         | 1.631                    | 28.295           |
| PY Paraguay       | 1.618                    | 2.314            |
| JP Japan          | 1.594                    | 175.443          |
| IN India          | 1.578                    | 236.380          |
| MZ Mozambique     | 1.551                    | 2.260            |
| MX Mexico         | 1.541                    | 51.225           |
| TN Tunisia        | 1.533                    | 2.771            |
| UA Ukraine        | 1.523                    | 22.100           |
| NZ New Zealand    | 1.507                    | 6.962            |
| DE Germany        | 1.499                    | 91.064           |
| FR France         | 1.420                    | 73.156           |
| BR Brazil         | 1.337                    | 81.104           |
| ZA South Africa   | 1.318                    | 31.336           |
| DZ Algeria        | 1.299                    | 9.206            |
| SD Sudan          | 1.287                    | 1.892            |
| GB United Kingdom | 1.286                    | 46.043           |
| SA Saudi Arabia   | 1.277                    | 48.182           |
| IR Iran           | 1.271                    | 39.385           |
| EG Egypt          | 1.260                    | 23.661           |
| US United States  | 1.245                    | 572.937          |
| MA Morocco        | 1.240                    | 4.443            |
| CN China          | 1.198                    | 881.871          |
| CA Canada         | 1.138                    | 71.994           |
| CL Chile          | 1.130                    | 9.936            |
| AU Australia      | 1.123                    | 30.637           |
| AR Argentina      | 1.116                    | 15.972           |
| RU Russia         | 1.089                    | 115.782          |
| LY Libya          | 1.053                    | 3.088            |

Table S2.4: Peak Residual Demand

|                   | Peak<br>Demand<br>[normalized] | Peak<br>Demand<br>[GW] |
|-------------------|--------------------------------|------------------------|
| TN Tunisia        | 1.425                          | 2.576                  |
| GB United Kingdom | 1.423                          | 50.967                 |
| DZ Algeria        | 1.414                          | 10.026                 |
| LY Libya          | 1.398                          | 4.100                  |
| SA Saudi Arabia   | 1.349                          | 50.892                 |
| DE Germany        | 1.288                          | 78.270                 |
| IT Italy          | 1.283                          | 44.867                 |
| TH Thailand       | 1.273                          | 28.297                 |
| JP Japan          | 1.268                          | 139.482                |
| MY Malaysia       | 1.264                          | 21.162                 |
| MA Morocco        | 1.252                          | 4.485                  |
| PL Poland         | 1.238                          | 21.475                 |
| EG Egypt          | 1.236                          | 23.207                 |
| KR South Korea    | 1.225                          | 75.946                 |
| ID Indonesia      | 1.179                          | 33.279                 |
| FR France         | 1.179                          | 60.739                 |
| ZA South Africa   | 1.167                          | 27.729                 |
| NG Nigeria        | 1.146                          | 3.513                  |
| AR Argentina      | 1.138                          | 16.286                 |
| UA Ukraine        | 1.128                          | 16.377                 |
| US United States  | 1.122                          | 516.329                |
| IR Iran           | 1.121                          | 34.739                 |
| AU Australia      | 1.106                          | 30.172                 |
| MX Mexico         | 1.084                          | 36.034                 |
| IN India          | 1.066                          | 159.781                |
| ES Spain          | 1.065                          | 30.069                 |
| PY Paraguay       | 1.017                          | 1.454                  |
| PE Peru           | 0.965                          | 5.366                  |
| TR Turkey         | 0.958                          | 24.419                 |
| CO Colombia       | 0.943                          | 7.654                  |
| VE Venezuela      | 0.885                          | 6.594                  |
| RU Russia         | 0.858                          | 91.189                 |
| VN Vietnam        | 0.839                          | 18.751                 |
| CN China          | 0.797                          | 587.125                |
| CL Chile          | 0.786                          | 6.916                  |
| CA Canada         | 0.785                          | 49.643                 |
| BR Brazil         | 0.728                          | 44.131                 |
| SE Sweden         | 0.719                          | 10.868                 |
| GH Ghana          | 0.563                          | 0.808                  |
| MZ Mozambique     | 0.433                          | 0.631                  |
| NZ New Zealand    | 0.351                          | 1.624                  |
| SD Sudan          | 0.169                          | 0.249                  |

Table S2.5: Max Hourly Ramp Up Rate

|                   | Ramp Rate<br>[normalized] | Ramp Rate<br>[GW/hr] |
|-------------------|---------------------------|----------------------|
| MY Malaysia       | 0.408                     | 6.826                |
| TN Tunisia        | 0.401                     | 0.726                |
| KR South Korea    | 0.367                     | 22.730               |
| TH Thailand       | 0.338                     | 7.518                |
| LY Libya          | 0.330                     | 0.966                |
| SA Saudi Arabia   | 0.297                     | 11.212               |
| MA Morocco        | 0.296                     | 1.061                |
| IR Iran           | 0.295                     | 9.157                |
| ZA South Africa   | 0.294                     | 6.994                |
| DZ Algeria        | 0.294                     | 2.083                |
| PL Poland         | 0.292                     | 5.065                |
| ID Indonesia      | 0.286                     | 8.078                |
| DE Germany        | 0.286                     | 17.366               |
| IN India          | 0.283                     | 42.401               |
| EG Egypt          | 0.277                     | 5.195                |
| MX Mexico         | 0.272                     | 9.051                |
| JP Japan          | 0.253                     | 27.806               |
| GB United Kingdom | 0.251                     | 9.001                |
| UA Ukraine        | 0.248                     | 3.598                |
| US United States  | 0.229                     | 105.272              |
| IT Italy          | 0.214                     | 7.469                |
| ES Spain          | 0.197                     | 5.569                |
| NG Nigeria        | 0.189                     | 0.581                |
| AR Argentina      | 0.177                     | 2.538                |
| AU Australia      | 0.172                     | 4.692                |
| FR France         | 0.166                     | 8.555                |
| CN China          | 0.158                     | 116.658              |
| TR Turkey         | 0.144                     | 3.674                |
| SE Sweden         | 0.134                     | 2.023                |
| CL Chile          | 0.110                     | 0.966                |
| VN Vietnam        | 0.104                     | 2.315                |
| PE Peru           | 0.100                     | 0.555                |
| NZ New Zealand    | 0.082                     | 0.380                |
| SD Sudan          | 0.080                     | 0.117                |
| GH Ghana          | 0.061                     | 0.088                |
| RU Russia         | 0.053                     | 5.612                |
| MZ Mozambique     | 0.045                     | 0.065                |
| PY Paraguay       | 0.000                     | 0.000                |
| BR Brazil         | 0.000                     | 0.000                |
| CA Canada         | 0.000                     | 0.000                |
| CO Colombia       | 0.000                     | 0.000                |
| VE Venezuela      | 0.000                     | 0.000                |

Table S2.6: Max Hourly Ramp Down Rate

|                   | Ramp Rate<br>[normalized] | Ramp Rate<br>[GW/hr] |
|-------------------|---------------------------|----------------------|
| MY Malaysia       | -0.445                    | -7.450               |
| TH Thailand       | -0.442                    | -9.817               |
| PE Peru           | -0.383                    | -2.131               |
| IN India          | -0.340                    | -50.944              |
| KR South Korea    | -0.338                    | -20.942              |
| IT Italy          | -0.337                    | -11.782              |
| ES Spain          | -0.327                    | -9.240               |
| PL Poland         | -0.312                    | -5.411               |
| UA Ukraine        | -0.312                    | -4.526               |
| NG Nigeria        | -0.302                    | -0.925               |
| DE Germany        | -0.299                    | -18.137              |
| MX Mexico         | -0.295                    | -9.799               |
| ZA South Africa   | -0.282                    | -6.700               |
| ID Indonesia      | -0.281                    | -7.934               |
| GB United Kingdom | -0.280                    | -10.017              |
| TN Tunisia        | -0.275                    | -0.497               |
| CN China          | -0.270                    | -198.459             |
| JP Japan          | -0.269                    | -29.563              |
| TR Turkey         | -0.266                    | -6.777               |
| EG Egypt          | -0.264                    | -4.950               |
| PY Paraguay       | -0.263                    | -0.376               |
| VN Vietnam        | -0.258                    | -5.762               |
| FR France         | -0.256                    | -13.167              |
| GH Ghana          | -0.253                    | -0.364               |
| SA Saudi Arabia   | -0.253                    | -9.563               |
| CL Chile          | -0.253                    | -2.222               |
| AU Australia      | -0.249                    | -6.800               |
| BR Brazil         | -0.248                    | -15.040              |
| AR Argentina      | -0.248                    | -3.549               |
| IR Iran           | -0.246                    | -7.631               |
| VE Venezuela      | -0.237                    | -1.765               |
| US United States  | -0.235                    | -108.214             |
| MA Morocco        | -0.235                    | -0.840               |
| LY Libya          | -0.234                    | -0.685               |
| MZ Mozambique     | -0.214                    | -0.312               |
| DZ Algeria        | -0.214                    | -1.520               |
| CO Colombia       | -0.194                    | -1.574               |
| SE Sweden         | -0.131                    | -1.979               |
| RU Russia         | -0.093                    | -9.927               |
| SD Sudan          | -0.085                    | -0.125               |
| NZ New Zealand    | -0.072                    | -0.335               |
| CA Canada         | -0.037                    | -2.357               |

Table S2.7: Sum of Hourly Ramp Up Rates

|                      | Ramp Rate<br>Sum<br>[normalized] | Ramp<br>Rate Sum<br>[GW/hr] |
|----------------------|----------------------------------|-----------------------------|
| MY Malaysia          | 362                              | 6053                        |
| ID Indonesia         | 353                              | 9957                        |
| TH Thailand          | 350                              | 7789                        |
| NG Nigeria           | 329                              | 1008                        |
| IT Italy             | 304                              | 10639                       |
| IN India             | 296                              | 44345                       |
| LY Libya             | 279                              | 819                         |
| ES Spain             | 265                              | 7493                        |
| TN Tunisia           | 263                              | 475                         |
| GB United<br>Kingdom | 261                              | 9334                        |
| EG Egypt             | 257                              | 4825                        |
| DZ Algeria           | 256                              | 1817                        |
| KR South Korea       | 248                              | 15381                       |
| ZA South Africa      | 247                              | 5862                        |
| MA Morocco           | 245                              | 877                         |
| PL Poland            | 243                              | 4218                        |
| MX Mexico            | 240                              | 7991                        |
| JP Japan             | 229                              | 25181                       |
| DE Germany           | 225                              | 13675                       |
| CN China             | 223                              | 163844                      |
| FR France            | 214                              | 11051                       |
| UA Ukraine           | 210                              | 3044                        |
| VN Vietnam           | 206                              | 4593                        |
| IR Iran              | 205                              | 6345                        |
| SA Saudi Arabia      | 198                              | 7483                        |
| US United States     | 197                              | 90762                       |
| TR Turkey            | 191                              | 4882                        |
| AU Australia         | 189                              | 5147                        |
| AR Argentina         | 178                              | 2545                        |
| GH Ghana             | 170                              | 245                         |
| CL Chile             | 165                              | 1453                        |
| RU Russia            | 101                              | 10703                       |
| SE Sweden            | 58                               | 882                         |
| PE Peru              | 33                               | 185                         |
| SD Sudan             | 3                                | 4                           |
| NZ New Zealand       | 2                                | 11                          |
| MZ Mozambique        | 0                                | 0                           |
| PY Paraguay          | 0                                | 0                           |
| BR Brazil            | 0                                | 0                           |
| CA Canada            | 0                                | 0                           |
| CO Colombia          | 0                                | 0                           |
| VE Venezuela         | 0                                | 0                           |

Table S2.8: Sum of Hourly Ramp Down Rates

|                   | Ramp Rate<br>Sum<br>[normalized] | Ramp<br>Rate Sum<br>[GW/hr] |
|-------------------|----------------------------------|-----------------------------|
| MY Malaysia       | -362                             | -6050                       |
| ID Indonesia      | -353                             | -9961                       |
| TH Thailand       | -350                             | -7793                       |
| NG Nigeria        | -329                             | -1008                       |
| IT Italy          | -305                             | -10649                      |
| IN India          | -296                             | -44360                      |
| LY Libya          | -279                             | -819                        |
| ES Spain          | -265                             | -7491                       |
| TN Tunisia        | -263                             | -475                        |
| GB United Kingdom | -261                             | -9336                       |
| EG Egypt          | -257                             | -4824                       |
| DZ Algeria        | -256                             | -1817                       |
| KR South Korea    | -248                             | -15371                      |
| ZA South Africa   | -246                             | -5855                       |
| MA Morocco        | -245                             | -878                        |
| PL Poland         | -243                             | -4219                       |
| MX Mexico         | -241                             | -7998                       |
| JP Japan          | -229                             | -25190                      |
| DE Germany        | -225                             | -13682                      |
| CN China          | -223                             | -164229                     |
| FR France         | -214                             | -11036                      |
| UA Ukraine        | -210                             | -3046                       |
| VN Vietnam        | -206                             | -4601                       |
| IR Iran           | -205                             | -6350                       |
| SA Saudi Arabia   | -198                             | -7479                       |
| US United States  | -198                             | -91078                      |
| TR Turkey         | -192                             | -4898                       |
| AU Australia      | -189                             | -5152                       |
| AR Argentina      | -178                             | -2548                       |
| GH Ghana          | -170                             | -245                        |
| CL Chile          | -165                             | -1454                       |
| RU Russia         | -101                             | -10747                      |
| SE Sweden         | -59                              | -891                        |
| PE Peru           | -34                              | -190                        |
| SD Sudan          | -3                               | -4                          |
| NZ New Zealand    | -3                               | -13                         |
| PY Paraguay       | -1                               | -1                          |
| CO Colombia       | -1                               | -8                          |
| VE Venezuela      | -1                               | -7                          |
| CA Canada         | -1                               | -51                         |
| BR Brazil         | -1                               | -45                         |
| MZ Mozambique     | -1                               | -1                          |



3. Scenario 3: VRE 70% (Solar: Wind = 1:1)

Table S3.1: No Residual Demand Duration

|                   | No Residual Demand Duration [hrs] |
|-------------------|-----------------------------------|
| MZ Mozambique     | 8755                              |
| BR Brazil         | 8750                              |
| PY Paraguay       | 8749                              |
| CO Colombia       | 8748                              |
| VE Venezuela      | 8748                              |
| PE Peru           | 8742                              |
| SD Sudan          | 8732                              |
| NZ New Zealand    | 8712                              |
| CA Canada         | 8710                              |
| SE Sweden         | 8565                              |
| GH Ghana          | 8298                              |
| CL Chile          | 7905                              |
| AR Argentina      | 5447                              |
| NG Nigeria        | 5266                              |
| TR Turkey         | 5013                              |
| VN Vietnam        | 4995                              |
| MY Malaysia       | 4337                              |
| IT Italy          | 4155                              |
| ID Indonesia      | 4060                              |
| KR South Korea    | 3809                              |
| TH Thailand       | 3494                              |
| IN India          | 3461                              |
| JP Japan          | 3391                              |
| ES Spain          | 3339                              |
| CN China          | 3203                              |
| PL Poland         | 3182                              |
| MX Mexico         | 2977                              |
| FR France         | 2915                              |
| ZA South Africa   | 2907                              |
| UA Ukraine        | 2884                              |
| DE Germany        | 2770                              |
| TN Tunisia        | 2698                              |
| GB United Kingdom | 2628                              |
| DZ Algeria        | 2325                              |
| MA Morocco        | 2287                              |
| RU Russia         | 2260                              |
| SA Saudi Arabia   | 2215                              |
| IR Iran           | 2123                              |
| US United States  | 2051                              |
| LY Libya          | 1874                              |
| EG Egypt          | 1703                              |
| AU Australia      | 1602                              |

Table S3.2: Curtailed VRE Energy

|                   | Curtailed E [normalized] | Curtailed E [GWh] |
|-------------------|--------------------------|-------------------|
| PE Peru           | 17347.32                 | 96513             |
| MY Malaysia       | 10749.61                 | 179902            |
| CO Colombia       | 5769.32                  | 46848             |
| ID Indonesia      | 4899.91                  | 138310            |
| SE Sweden         | 2742.56                  | 41441             |
| GH Ghana          | 2327.32                  | 3344              |
| VN Vietnam        | 2303.61                  | 51468             |
| KR South Korea    | 2217.58                  | 137433            |
| TH Thailand       | 1946.54                  | 43281             |
| VE Venezuela      | 1743.24                  | 12986             |
| NG Nigeria        | 1646.67                  | 5047              |
| IT Italy          | 1632.43                  | 57078             |
| PY Paraguay       | 1606.36                  | 2298              |
| JP Japan          | 1288.34                  | 141766            |
| TR Turkey         | 1143.21                  | 29147             |
| PL Poland         | 1106.62                  | 19194             |
| BR Brazil         | 1103.41                  | 66910             |
| IN India          | 1060.75                  | 158927            |
| CL Chile          | 993.04                   | 8732              |
| ES Spain          | 866.16                   | 24463             |
| NZ New Zealand    | 827.17                   | 3822              |
| DE Germany        | 818.94                   | 49754             |
| TN Tunisia        | 816.94                   | 1477              |
| UA Ukraine        | 785.21                   | 11397             |
| MX Mexico         | 768.49                   | 25544             |
| ZA South Africa   | 735.82                   | 17490             |
| CN China          | 706.58                   | 520284            |
| GB United Kingdom | 640.36                   | 22928             |
| FR France         | 630.55                   | 32493             |
| AR Argentina      | 576.20                   | 8248              |
| MZ Mozambique     | 547.13                   | 797               |
| DZ Algeria        | 532.53                   | 3775              |
| SA Saudi Arabia   | 520.47                   | 19639             |
| SD Sudan          | 448.59                   | 659               |
| MA Morocco        | 399.12                   | 1430              |
| US United States  | 374.65                   | 172457            |
| IR Iran           | 351.24                   | 10885             |
| CA Canada         | 345.08                   | 21827             |
| LY Libya          | 336.36                   | 986               |
| AU Australia      | 237.68                   | 6483              |
| RU Russia         | 188.54                   | 20043             |
| EG Egypt          | 162.36                   | 3050              |

Table S3.3: VRE Total Installed Capacity

|                   | Capacity<br>[normalized] | Capacity<br>[GW] |
|-------------------|--------------------------|------------------|
| MY Malaysia       | 9.499                    | 158.98           |
| PE Peru           | 8.370                    | 46.56            |
| CO Colombia       | 5.210                    | 42.31            |
| ID Indonesia      | 3.908                    | 110.31           |
| SE Sweden         | 3.893                    | 58.82            |
| VN Vietnam        | 3.576                    | 79.89            |
| GH Ghana          | 3.560                    | 5.11             |
| KR South Korea    | 3.550                    | 220.00           |
| TH Thailand       | 3.471                    | 77.17            |
| IT Italy          | 3.222                    | 112.65           |
| NG Nigeria        | 3.052                    | 9.36             |
| VE Venezuela      | 2.949                    | 21.97            |
| PY Paraguay       | 2.704                    | 3.87             |
| TR Turkey         | 2.663                    | 67.91            |
| PL Poland         | 2.649                    | 45.94            |
| JP Japan          | 2.621                    | 288.44           |
| ES Spain          | 2.584                    | 72.97            |
| IN India          | 2.575                    | 385.83           |
| MX Mexico         | 2.404                    | 79.89            |
| TN Tunisia        | 2.382                    | 4.31             |
| UA Ukraine        | 2.369                    | 34.38            |
| NZ New Zealand    | 2.367                    | 10.94            |
| DE Germany        | 2.349                    | 142.72           |
| MZ Mozambique     | 2.340                    | 3.41             |
| BR Brazil         | 2.181                    | 132.27           |
| FR France         | 2.163                    | 111.45           |
| ZA South Africa   | 2.042                    | 48.54            |
| GB United Kingdom | 1.969                    | 70.50            |
| DZ Algeria        | 1.953                    | 13.85            |
| SA Saudi Arabia   | 1.922                    | 72.52            |
| SD Sudan          | 1.921                    | 2.82             |
| IR Iran           | 1.876                    | 58.14            |
| CN China          | 1.862                    | 1371.26          |
| US United States  | 1.841                    | 847.27           |
| MA Morocco        | 1.840                    | 6.59             |
| CL Chile          | 1.824                    | 16.04            |
| EG Egypt          | 1.808                    | 33.96            |
| AR Argentina      | 1.696                    | 24.27            |
| CA Canada         | 1.676                    | 105.98           |
| AU Australia      | 1.631                    | 44.48            |
| RU Russia         | 1.571                    | 166.98           |
| LY Libya          | 1.551                    | 4.55             |

Table S3.4: Peak Residual Demand

|                   | Peak<br>Demand<br>[normalized] | Peak<br>Demand<br>[GW] |
|-------------------|--------------------------------|------------------------|
| GB United Kingdom | 1.367                          | 48.948                 |
| TN Tunisia        | 1.357                          | 2.453                  |
| LY Libya          | 1.350                          | 3.960                  |
| DZ Algeria        | 1.349                          | 9.563                  |
| SA Saudi Arabia   | 1.289                          | 48.632                 |
| PL Poland         | 1.288                          | 22.345                 |
| DE Germany        | 1.285                          | 78.069                 |
| TH Thailand       | 1.277                          | 28.385                 |
| KR South Korea    | 1.212                          | 75.121                 |
| MA Morocco        | 1.174                          | 4.207                  |
| ZA South Africa   | 1.129                          | 26.834                 |
| EG Egypt          | 1.124                          | 21.120                 |
| JP Japan          | 1.115                          | 122.671                |
| UA Ukraine        | 1.028                          | 14.916                 |
| ID Indonesia      | 1.025                          | 28.923                 |
| IR Iran           | 1.011                          | 31.332                 |
| FR France         | 1.004                          | 51.756                 |
| IT Italy          | 0.989                          | 34.585                 |
| MY Malaysia       | 0.981                          | 16.425                 |
| US United States  | 0.981                          | 451.495                |
| MX Mexico         | 0.973                          | 32.349                 |
| AU Australia      | 0.946                          | 25.814                 |
| ES Spain          | 0.897                          | 25.335                 |
| IN India          | 0.886                          | 132.800                |
| NG Nigeria        | 0.715                          | 2.191                  |
| CN China          | 0.669                          | 492.666                |
| PE Peru           | 0.664                          | 3.692                  |
| PY Paraguay       | 0.643                          | 0.920                  |
| VE Venezuela      | 0.635                          | 4.733                  |
| CA Canada         | 0.634                          | 40.119                 |
| BR Brazil         | 0.576                          | 34.930                 |
| RU Russia         | 0.553                          | 58.808                 |
| CO Colombia       | 0.546                          | 4.437                  |
| TR Turkey         | 0.534                          | 13.611                 |
| AR Argentina      | 0.518                          | 7.420                  |
| CL Chile          | 0.450                          | 3.958                  |
| SE Sweden         | 0.446                          | 6.732                  |
| GH Ghana          | 0.406                          | 0.583                  |
| VN Vietnam        | 0.377                          | 8.426                  |
| MZ Mozambique     | 0.296                          | 0.431                  |
| NZ New Zealand    | 0.150                          | 0.691                  |
| SD Sudan          | 0.105                          | 0.154                  |

Table S3.5: Max Hourly Ramp Up Rate

|                   | Ramp Rate<br>[normalized] | Ramp Rate<br>[GW/hr] |
|-------------------|---------------------------|----------------------|
| TN Tunisia        | 0.508                     | 0.918                |
| KR South Korea    | 0.501                     | 31.025               |
| TH Thailand       | 0.475                     | 10.555               |
| MY Malaysia       | 0.433                     | 7.254                |
| LY Libya          | 0.426                     | 1.250                |
| PL Poland         | 0.403                     | 6.988                |
| SA Saudi Arabia   | 0.383                     | 14.465               |
| DE Germany        | 0.380                     | 23.106               |
| ID Indonesia      | 0.372                     | 10.496               |
| ZA South Africa   | 0.364                     | 8.655                |
| DZ Algeria        | 0.360                     | 2.551                |
| EG Egypt          | 0.346                     | 6.500                |
| IN India          | 0.323                     | 48.434               |
| GB United Kingdom | 0.322                     | 11.540               |
| IR Iran           | 0.295                     | 9.129                |
| MA Morocco        | 0.288                     | 1.032                |
| JP Japan          | 0.288                     | 31.656               |
| UA Ukraine        | 0.284                     | 4.124                |
| US United States  | 0.260                     | 119.454              |
| MX Mexico         | 0.239                     | 7.950                |
| NG Nigeria        | 0.226                     | 0.692                |
| FR France         | 0.223                     | 11.498               |
| AR Argentina      | 0.219                     | 3.136                |
| IT Italy          | 0.213                     | 7.437                |
| GH Ghana          | 0.203                     | 0.291                |
| SE Sweden         | 0.193                     | 2.916                |
| AU Australia      | 0.186                     | 5.062                |
| ES Spain          | 0.182                     | 5.138                |
| CL Chile          | 0.156                     | 1.372                |
| VN Vietnam        | 0.144                     | 3.218                |
| CN China          | 0.140                     | 103.062              |
| RU Russia         | 0.083                     | 8.840                |
| NZ New Zealand    | 0.074                     | 0.340                |
| TR Turkey         | 0.058                     | 1.484                |
| SD Sudan          | 0.053                     | 0.077                |
| PE Peru           | 0.016                     | 0.092                |
| MZ Mozambique     | 0.010                     | 0.015                |
| BR Brazil         | 0.000                     | 0.000                |
| CA Canada         | 0.000                     | 0.000                |
| CO Colombia       | 0.000                     | 0.000                |
| PY Paraguay       | 0.000                     | 0.000                |
| VE Venezuela      | 0.000                     | 0.000                |

Table S3.6: Max Hourly Ramp Down Rate

|                   | Ramp Rate<br>[normalized] | Ramp Rate<br>[GW/hr] |
|-------------------|---------------------------|----------------------|
| KR South Korea    | -0.500                    | -30.96               |
| MY Malaysia       | -0.441                    | -7.37                |
| ES Spain          | -0.431                    | -12.19               |
| PL Poland         | -0.424                    | -7.35                |
| ZA South Africa   | -0.422                    | -10.04               |
| TH Thailand       | -0.403                    | -8.96                |
| MX Mexico         | -0.397                    | -13.20               |
| IT Italy          | -0.391                    | -13.68               |
| IN India          | -0.382                    | -57.22               |
| TN Tunisia        | -0.370                    | -0.67                |
| DE Germany        | -0.362                    | -21.98               |
| UA Ukraine        | -0.328                    | -4.76                |
| SA Saudi Arabia   | -0.318                    | -12.01               |
| EG Egypt          | -0.314                    | -5.89                |
| US United States  | -0.308                    | -141.94              |
| PE Peru           | -0.307                    | -1.71                |
| JP Japan          | -0.302                    | -33.27               |
| IR Iran           | -0.301                    | -9.31                |
| CN China          | -0.293                    | -215.50              |
| LY Libya          | -0.290                    | -0.85                |
| AU Australia      | -0.287                    | -7.81                |
| DZ Algeria        | -0.279                    | -1.98                |
| ID Indonesia      | -0.274                    | -7.73                |
| MA Morocco        | -0.272                    | -0.97                |
| GB United Kingdom | -0.267                    | -9.57                |
| FR France         | -0.258                    | -13.32               |
| NG Nigeria        | -0.247                    | -0.76                |
| BR Brazil         | -0.240                    | -14.55               |
| GH Ghana          | -0.187                    | -0.27                |
| SE Sweden         | -0.176                    | -2.66                |
| PY Paraguay       | -0.175                    | -0.25                |
| TR Turkey         | -0.171                    | -4.36                |
| CL Chile          | -0.169                    | -1.49                |
| VE Venezuela      | -0.166                    | -1.23                |
| VN Vietnam        | -0.155                    | -3.46                |
| MZ Mozambique     | -0.148                    | -0.22                |
| AR Argentina      | -0.124                    | -1.78                |
| RU Russia         | -0.105                    | -11.20               |
| CO Colombia       | -0.105                    | -0.85                |
| CA Canada         | -0.061                    | -3.84                |
| NZ New Zealand    | -0.057                    | -0.26                |
| SD Sudan          | -0.053                    | -0.08                |

Table S3.7: Sum of Hourly Ramp Up Rates

|                   | Ramp Rate Sum<br>[normalized] | Ramp Rate Sum<br>[GW/hr] |
|-------------------|-------------------------------|--------------------------|
| TH Thailand       | 312                           | 6947                     |
| LY Libya          | 307                           | 901                      |
| EG Egypt          | 272                           | 5101                     |
| TN Tunisia        | 269                           | 487                      |
| DZ Algeria        | 266                           | 1885                     |
| MY Malaysia       | 260                           | 4348                     |
| ID Indonesia      | 256                           | 7239                     |
| ZA South Africa   | 249                           | 5915                     |
| KR South Korea    | 245                           | 15182                    |
| IN India          | 244                           | 36619                    |
| GB United Kingdom | 236                           | 8432                     |
| PL Poland         | 235                           | 4068                     |
| ES Spain          | 227                           | 6400                     |
| MX Mexico         | 227                           | 7531                     |
| SA Saudi Arabia   | 224                           | 8468                     |
| IT Italy          | 223                           | 7811                     |
| MA Morocco        | 222                           | 795                      |
| DE Germany        | 218                           | 13220                    |
| IR Iran           | 216                           | 6682                     |
| JP Japan          | 194                           | 21392                    |
| US United States  | 194                           | 89407                    |
| AU Australia      | 194                           | 5278                     |
| UA Ukraine        | 182                           | 2636                     |
| FR France         | 169                           | 8686                     |
| NG Nigeria        | 162                           | 497                      |
| CN China          | 147                           | 108581                   |
| RU Russia         | 83                            | 8874                     |
| VN Vietnam        | 69                            | 1539                     |
| TR Turkey         | 67                            | 1712                     |
| GH Ghana          | 22                            | 32                       |
| CL Chile          | 19                            | 169                      |
| AR Argentina      | 18                            | 263                      |
| SE Sweden         | 4                             | 63                       |
| NZ New Zealand    | 1                             | 5                        |
| SD Sudan          | 1                             | 1                        |
| PE Peru           | 0                             | 0                        |
| MZ Mozambique     | 0                             | 0                        |
| BR Brazil         | 0                             | 0                        |
| CA Canada         | 0                             | 0                        |
| CO Colombia       | 0                             | 0                        |
| PY Paraguay       | 0                             | 0                        |
| VE Venezuela      | 0                             | 0                        |

Table S3.8: Sum of Hourly Ramp Down Rates

|                   | Ramp Rate Sum<br>[normalized] | Ramp Rate Sum<br>[GW/hr] |
|-------------------|-------------------------------|--------------------------|
| TH Thailand       | -312                          | -6946                    |
| LY Libya          | -307                          | -901                     |
| EG Egypt          | -271                          | -5098                    |
| TN Tunisia        | -269                          | -487                     |
| DZ Algeria        | -266                          | -1885                    |
| MY Malaysia       | -260                          | -4348                    |
| ID Indonesia      | -256                          | -7239                    |
| ZA South Africa   | -248                          | -5902                    |
| KR South Korea    | -245                          | -15186                   |
| IN India          | -245                          | -36650                   |
| GB United Kingdom | -236                          | -8432                    |
| PL Poland         | -235                          | -4068                    |
| MX Mexico         | -227                          | -7542                    |
| ES Spain          | -227                          | -6401                    |
| SA Saudi Arabia   | -224                          | -8464                    |
| IT Italy          | -223                          | -7811                    |
| MA Morocco        | -222                          | -795                     |
| DE Germany        | -218                          | -13220                   |
| IR Iran           | -216                          | -6687                    |
| US United States  | -195                          | -89760                   |
| JP Japan          | -194                          | -21392                   |
| AU Australia      | -194                          | -5278                    |
| UA Ukraine        | -182                          | -2638                    |
| FR France         | -168                          | -8649                    |
| NG Nigeria        | -162                          | -497                     |
| CN China          | -148                          | -108983                  |
| RU Russia         | -84                           | -8915                    |
| VN Vietnam        | -69                           | -1543                    |
| TR Turkey         | -68                           | -1726                    |
| GH Ghana          | -22                           | -32                      |
| CL Chile          | -20                           | -173                     |
| AR Argentina      | -19                           | -269                     |
| SE Sweden         | -5                            | -68                      |
| NZ New Zealand    | -1                            | -5                       |
| PE Peru           | -1                            | -4                       |
| VE Venezuela      | -1                            | -5                       |
| PY Paraguay       | -1                            | -1                       |
| CA Canada         | -1                            | -41                      |
| SD Sudan          | -1                            | -1                       |
| BR Brazil         | -1                            | -36                      |
| CO Colombia       | -1                            | -5                       |
| MZ Mozambique     | 0                             | 0                        |

4. Scenario 4: VRE 70% (Solar: Wind = 1:2)

Table S4.1: No Residual Demand Duration

|                   | No Residual Demand Duration [hrs] |
|-------------------|-----------------------------------|
| MZ Mozambique     | 8754                              |
| BR Brazil         | 8750                              |
| PY Paraguay       | 8750                              |
| SD Sudan          | 8749                              |
| CO Colombia       | 8748                              |
| VE Venezuela      | 8748                              |
| PE Peru           | 8744                              |
| CA Canada         | 8726                              |
| NZ New Zealand    | 8706                              |
| SE Sweden         | 8586                              |
| GH Ghana          | 8372                              |
| CL Chile          | 8044                              |
| AR Argentina      | 4997                              |
| NG Nigeria        | 4649                              |
| VN Vietnam        | 4573                              |
| TR Turkey         | 4450                              |
| MY Malaysia       | 4163                              |
| IT Italy          | 3874                              |
| ID Indonesia      | 3574                              |
| KR South Korea    | 3205                              |
| PL Poland         | 3133                              |
| JP Japan          | 3046                              |
| TH Thailand       | 2996                              |
| ES Spain          | 2984                              |
| FR France         | 2915                              |
| DE Germany        | 2872                              |
| TN Tunisia        | 2761                              |
| CN China          | 2560                              |
| GB United Kingdom | 2513                              |
| UA Ukraine        | 2334                              |
| DZ Algeria        | 2315                              |
| ZA South Africa   | 2312                              |
| EG Egypt          | 2172                              |
| MA Morocco        | 2084                              |
| IN India          | 1930                              |
| MX Mexico         | 1764                              |
| LY Libya          | 1734                              |
| US United States  | 1667                              |
| SA Saudi Arabia   | 1659                              |
| RU Russia         | 1428                              |
| AU Australia      | 1289                              |
| IR Iran           | 1159                              |

Table S4.2: Curtailed VRE Energy

|                   | Curtailed E [normalized] | Curtailed E [GWh] |
|-------------------|--------------------------|-------------------|
| PE Peru           | 8183                     | 45529             |
| MY Malaysia       | 4900                     | 82007             |
| CO Colombia       | 2665                     | 21639             |
| KR South Korea    | 2024                     | 125438            |
| NG Nigeria        | 1892                     | 5799              |
| PY Paraguay       | 1857                     | 2656              |
| GH Ghana          | 1841                     | 2645              |
| ID Indonesia      | 1831                     | 51677             |
| SE Sweden         | 1677                     | 25332             |
| IT Italy          | 1660                     | 58052             |
| PL Poland         | 1470                     | 25502             |
| TH Thailand       | 1183                     | 26299             |
| TN Tunisia        | 1152                     | 2083              |
| DE Germany        | 1076                     | 65384             |
| JP Japan          | 1037                     | 114069            |
| VN Vietnam        | 998                      | 22298             |
| VE Venezuela      | 939                      | 6996              |
| ES Spain          | 900                      | 25406             |
| NZ New Zealand    | 737                      | 3405              |
| TR Turkey         | 726                      | 18517             |
| SD Sudan          | 723                      | 1062              |
| FR France         | 710                      | 36569             |
| MZ Mozambique     | 704                      | 1025              |
| ZA South Africa   | 701                      | 16654             |
| GB United Kingdom | 608                      | 21763             |
| DZ Algeria        | 575                      | 4074              |
| CL Chile          | 551                      | 4845              |
| UA Ukraine        | 516                      | 7487              |
| IN India          | 469                      | 70299             |
| BR Brazil         | 376                      | 22779             |
| MA Morocco        | 369                      | 1322              |
| MX Mexico         | 353                      | 11736             |
| AR Argentina      | 328                      | 4698              |
| SA Saudi Arabia   | 318                      | 11986             |
| EG Egypt          | 318                      | 5965              |
| LY Libya          | 305                      | 894               |
| CN China          | 300                      | 220810            |
| US United States  | 241                      | 110970            |
| CA Canada         | 136                      | 8621              |
| IR Iran           | 130                      | 4028              |
| AU Australia      | 118                      | 3205              |
| RU Russia         | 53                       | 5596              |

Table S4.3: VRE Total Installed Capacity

|                   | Capacity<br>[normalized] | Capacity<br>[GW] |
|-------------------|--------------------------|------------------|
| MY Malaysia       | 6.712                    | 112.32           |
| PE Peru           | 5.190                    | 28.88            |
| CO Colombia       | 4.083                    | 33.15            |
| GH Ghana          | 3.504                    | 5.03             |
| KR South Korea    | 3.460                    | 214.44           |
| TH Thailand       | 3.439                    | 76.47            |
| SE Sweden         | 3.289                    | 49.70            |
| NG Nigeria        | 3.257                    | 9.98             |
| IT Italy          | 3.253                    | 113.75           |
| VN Vietnam        | 3.181                    | 71.08            |
| PY Paraguay       | 2.716                    | 3.89             |
| VE Venezuela      | 2.662                    | 19.83            |
| PL Poland         | 2.657                    | 46.08            |
| TR Turkey         | 2.620                    | 66.81            |
| ES Spain          | 2.594                    | 73.26            |
| ID Indonesia      | 2.559                    | 72.22            |
| JP Japan          | 2.528                    | 278.23           |
| TN Tunisia        | 2.481                    | 4.48             |
| MZ Mozambique     | 2.472                    | 3.60             |
| IN India          | 2.466                    | 369.45           |
| MX Mexico         | 2.272                    | 75.53            |
| DE Germany        | 2.247                    | 136.48           |
| UA Ukraine        | 2.227                    | 32.33            |
| NZ New Zealand    | 2.180                    | 10.07            |
| FR France         | 2.112                    | 108.84           |
| ZA South Africa   | 2.003                    | 47.61            |
| SD Sudan          | 1.959                    | 2.88             |
| BR Brazil         | 1.930                    | 117.03           |
| DZ Algeria        | 1.922                    | 13.62            |
| EG Egypt          | 1.826                    | 34.29            |
| SA Saudi Arabia   | 1.824                    | 68.82            |
| GB United Kingdom | 1.809                    | 64.77            |
| IR Iran           | 1.745                    | 54.09            |
| MA Morocco        | 1.741                    | 6.24             |
| CN China          | 1.731                    | 1274.65          |
| US United States  | 1.721                    | 792.37           |
| CL Chile          | 1.599                    | 14.06            |
| AU Australia      | 1.572                    | 42.87            |
| AR Argentina      | 1.504                    | 21.53            |
| LY Libya          | 1.493                    | 4.38             |
| CA Canada         | 1.431                    | 90.52            |
| RU Russia         | 1.355                    | 144.07           |

Table S4.4: Peak Residual Demand

|                   | Peak<br>Demand<br>[normalized] | Peak<br>Demand<br>[GW] |
|-------------------|--------------------------------|------------------------|
| GB United Kingdom | 1.341                          | 48.029                 |
| LY Libya          | 1.306                          | 3.830                  |
| PL Poland         | 1.283                          | 22.255                 |
| TN Tunisia        | 1.280                          | 2.313                  |
| DE Germany        | 1.270                          | 77.144                 |
| DZ Algeria        | 1.256                          | 8.905                  |
| SA Saudi Arabia   | 1.248                          | 47.108                 |
| TH Thailand       | 1.238                          | 27.537                 |
| KR South Korea    | 1.139                          | 70.602                 |
| JP Japan          | 1.103                          | 121.402                |
| MA Morocco        | 1.092                          | 3.912                  |
| ZA South Africa   | 1.091                          | 25.929                 |
| EG Egypt          | 1.085                          | 20.371                 |
| ID Indonesia      | 1.082                          | 30.540                 |
| UA Ukraine        | 1.047                          | 15.200                 |
| MY Malaysia       | 1.047                          | 17.525                 |
| FR France         | 1.000                          | 51.534                 |
| IT Italy          | 0.975                          | 34.096                 |
| AU Australia      | 0.971                          | 26.485                 |
| IR Iran           | 0.962                          | 29.807                 |
| MX Mexico         | 0.908                          | 30.169                 |
| IN India          | 0.896                          | 134.211                |
| US United States  | 0.855                          | 393.476                |
| ES Spain          | 0.833                          | 23.520                 |
| NG Nigeria        | 0.686                          | 2.102                  |
| PE Peru           | 0.650                          | 3.618                  |
| CN China          | 0.595                          | 437.877                |
| CA Canada         | 0.561                          | 35.464                 |
| RU Russia         | 0.559                          | 59.433                 |
| VE Venezuela      | 0.526                          | 3.921                  |
| AR Argentina      | 0.505                          | 7.231                  |
| BR Brazil         | 0.487                          | 29.508                 |
| TR Turkey         | 0.485                          | 12.361                 |
| CO Colombia       | 0.466                          | 3.786                  |
| SE Sweden         | 0.438                          | 6.611                  |
| GH Ghana          | 0.400                          | 0.575                  |
| VN Vietnam        | 0.365                          | 8.161                  |
| CL Chile          | 0.365                          | 3.212                  |
| PY Paraguay       | 0.361                          | 0.517                  |
| NZ New Zealand    | 0.300                          | 1.386                  |
| MZ Mozambique     | 0.151                          | 0.220                  |
| SD Sudan          | 0.054                          | 0.080                  |

Table S4.5: Max Hourly Ramp Up Rate

|                   | Ramp Rate<br>[normalized] | Ramp Rate<br>[GW/hr] |
|-------------------|---------------------------|----------------------|
| KR South Korea    | 0.419                     | 25.975               |
| TN Tunisia        | 0.416                     | 0.751                |
| MY Malaysia       | 0.399                     | 6.673                |
| TH Thailand       | 0.332                     | 7.375                |
| LY Libya          | 0.313                     | 0.917                |
| PL Poland         | 0.303                     | 5.248                |
| ID Indonesia      | 0.296                     | 8.357                |
| MA Morocco        | 0.285                     | 1.023                |
| SA Saudi Arabia   | 0.276                     | 10.418               |
| DZ Algeria        | 0.270                     | 1.914                |
| GB United Kingdom | 0.264                     | 9.455                |
| FR France         | 0.263                     | 13.549               |
| ZA South Africa   | 0.262                     | 6.237                |
| UA Ukraine        | 0.262                     | 3.807                |
| DE Germany        | 0.259                     | 15.760               |
| IN India          | 0.251                     | 37.539               |
| EG Egypt          | 0.248                     | 4.662                |
| IR Iran           | 0.244                     | 7.576                |
| IT Italy          | 0.213                     | 7.431                |
| NG Nigeria        | 0.195                     | 0.597                |
| GH Ghana          | 0.193                     | 0.277                |
| US United States  | 0.186                     | 85.733               |
| AR Argentina      | 0.184                     | 2.640                |
| MX Mexico         | 0.184                     | 6.116                |
| AU Australia      | 0.179                     | 4.881                |
| JP Japan          | 0.158                     | 17.401               |
| SE Sweden         | 0.149                     | 2.257                |
| ES Spain          | 0.142                     | 3.998                |
| CL Chile          | 0.138                     | 1.214                |
| CN China          | 0.126                     | 92.527               |
| VN Vietnam        | 0.113                     | 2.517                |
| NZ New Zealand    | 0.065                     | 0.298                |
| TR Turkey         | 0.060                     | 1.533                |
| RU Russia         | 0.053                     | 5.609                |
| SD Sudan          | 0.027                     | 0.040                |
| MZ Mozambique     | 0.023                     | 0.033                |
| PE Peru           | 0.014                     | 0.075                |
| BR Brazil         | 0.000                     | 0.000                |
| CA Canada         | 0.000                     | 0.000                |
| CO Colombia       | 0.000                     | 0.000                |
| PY Paraguay       | 0.000                     | 0.000                |
| VE Venezuela      | 0.000                     | 0.000                |

Table S4.6: Max Hourly Ramp Down Rate

|                   | Ramp Rate<br>[normalized] | Ramp Rate<br>[GW/hr] |
|-------------------|---------------------------|----------------------|
| MY Malaysia       | -0.452                    | -7.57                |
| TN Tunisia        | -0.410                    | -0.74                |
| PL Poland         | -0.385                    | -6.68                |
| TH Thailand       | -0.382                    | -8.50                |
| KR South Korea    | -0.364                    | -22.56               |
| IT Italy          | -0.342                    | -11.95               |
| ZA South Africa   | -0.338                    | -8.03                |
| LY Libya          | -0.332                    | -0.97                |
| DE Germany        | -0.330                    | -20.03               |
| IN India          | -0.328                    | -49.10               |
| ES Spain          | -0.321                    | -9.06                |
| PE Peru           | -0.302                    | -1.68                |
| DZ Algeria        | -0.300                    | -2.13                |
| VN Vietnam        | -0.292                    | -6.53                |
| EG Egypt          | -0.285                    | -5.36                |
| MX Mexico         | -0.283                    | -9.42                |
| UA Ukraine        | -0.275                    | -3.99                |
| SA Saudi Arabia   | -0.274                    | -10.33               |
| GB United Kingdom | -0.264                    | -9.47                |
| ID Indonesia      | -0.260                    | -7.34                |
| FR France         | -0.258                    | -13.30               |
| JP Japan          | -0.255                    | -28.07               |
| AU Australia      | -0.248                    | -6.78                |
| MA Morocco        | -0.245                    | -0.88                |
| NG Nigeria        | -0.243                    | -0.74                |
| US United States  | -0.238                    | -109.75              |
| CN China          | -0.233                    | -171.37              |
| IR Iran           | -0.209                    | -6.49                |
| BR Brazil         | -0.207                    | -12.57               |
| GH Ghana          | -0.180                    | -0.26                |
| TR Turkey         | -0.145                    | -3.71                |
| CL Chile          | -0.132                    | -1.16                |
| VE Venezuela      | -0.126                    | -0.94                |
| AR Argentina      | -0.118                    | -1.69                |
| SE Sweden         | -0.100                    | -1.51                |
| PY Paraguay       | -0.086                    | -0.12                |
| RU Russia         | -0.085                    | -9.01                |
| CO Colombia       | -0.084                    | -0.68                |
| MZ Mozambique     | -0.075                    | -0.11                |
| NZ New Zealand    | -0.060                    | -0.28                |
| CA Canada         | -0.039                    | -2.46                |
| SD Sudan          | -0.027                    | -0.04                |

Table S4.7: Sum of Hourly Ramp Up Rates

|                   | Ramp Rate Sum<br>[normalized] | Ramp Rate Sum<br>[GW/hr] |
|-------------------|-------------------------------|--------------------------|
| TH Thailand       | 287                           | 6376                     |
| MY Malaysia       | 261                           | 4372                     |
| LY Libya          | 253                           | 743                      |
| ID Indonesia      | 247                           | 6967                     |
| TN Tunisia        | 230                           | 415                      |
| IN India          | 228                           | 34126                    |
| DZ Algeria        | 216                           | 1529                     |
| KR South Korea    | 209                           | 12957                    |
| EG Egypt          | 208                           | 3913                     |
| ZA South Africa   | 202                           | 4799                     |
| PL Poland         | 201                           | 3483                     |
| GB United Kingdom | 196                           | 7008                     |
| IT Italy          | 195                           | 6824                     |
| ES Spain          | 188                           | 5317                     |
| DE Germany        | 187                           | 11386                    |
| MA Morocco        | 181                           | 648                      |
| SA Saudi Arabia   | 180                           | 6776                     |
| MX Mexico         | 174                           | 5789                     |
| AU Australia      | 168                           | 4592                     |
| JP Japan          | 164                           | 18049                    |
| IR Iran           | 159                           | 4917                     |
| UA Ukraine        | 156                           | 2270                     |
| US United States  | 154                           | 70845                    |
| FR France         | 153                           | 7890                     |
| NG Nigeria        | 149                           | 455                      |
| CN China          | 147                           | 108032                   |
| RU Russia         | 75                            | 7923                     |
| TR Turkey         | 63                            | 1616                     |
| VN Vietnam        | 61                            | 1372                     |
| AR Argentina      | 18                            | 256                      |
| GH Ghana          | 17                            | 25                       |
| CL Chile          | 16                            | 139                      |
| SE Sweden         | 3                             | 49                       |
| NZ New Zealand    | 1                             | 3                        |
| SD Sudan          | 0                             | 0                        |
| MZ Mozambique     | 0                             | 0                        |
| PE Peru           | 0                             | 0                        |
| BR Brazil         | 0                             | 0                        |
| CA Canada         | 0                             | 0                        |
| CO Colombia       | 0                             | 0                        |
| PY Paraguay       | 0                             | 0                        |
| VE Venezuela      | 0                             | 0                        |

Table S4.8: Sum of Hourly Ramp Down Rates

|                   | Ramp Rate Sum<br>[normalized] | Ramp Rate Sum<br>[GW/hr] |
|-------------------|-------------------------------|--------------------------|
| TH Thailand       | -287                          | -6378                    |
| MY Malaysia       | -261                          | -4372                    |
| LY Libya          | -253                          | -743                     |
| ID Indonesia      | -247                          | -6967                    |
| TN Tunisia        | -230                          | -415                     |
| IN India          | -228                          | -34155                   |
| DZ Algeria        | -216                          | -1529                    |
| KR South Korea    | -209                          | -12957                   |
| EG Egypt          | -208                          | -3911                    |
| ZA South Africa   | -201                          | -4783                    |
| PL Poland         | -201                          | -3483                    |
| GB United Kingdom | -196                          | -7008                    |
| IT Italy          | -195                          | -6824                    |
| ES Spain          | -188                          | -5316                    |
| DE Germany        | -187                          | -11386                   |
| MA Morocco        | -181                          | -648                     |
| SA Saudi Arabia   | -180                          | -6776                    |
| MX Mexico         | -174                          | -5799                    |
| AU Australia      | -168                          | -4594                    |
| JP Japan          | -164                          | -18049                   |
| IR Iran           | -159                          | -4923                    |
| UA Ukraine        | -156                          | -2270                    |
| US United States  | -155                          | -71232                   |
| FR France         | -152                          | -7856                    |
| NG Nigeria        | -149                          | -455                     |
| CN China          | -147                          | -108390                  |
| RU Russia         | -75                           | -7954                    |
| TR Turkey         | -64                           | -1629                    |
| VN Vietnam        | -62                           | -1383                    |
| AR Argentina      | -18                           | -260                     |
| GH Ghana          | -17                           | -25                      |
| CL Chile          | -16                           | -142                     |
| SE Sweden         | -4                            | -53                      |
| NZ New Zealand    | -1                            | -5                       |
| PE Peru           | -1                            | -4                       |
| CA Canada         | -1                            | -36                      |
| VE Venezuela      | -1                            | -4                       |
| BR Brazil         | -1                            | -30                      |
| CO Colombia       | 0                             | -4                       |
| PY Paraguay       | 0                             | -1                       |
| MZ Mozambique     | 0                             | 0                        |
| SD Sudan          | 0                             | 0                        |



5. Scenario 5: VRE 70% (Solar: Wind = 2:1)

Table 5.1: No Residual Demand Duration

|                   | No Residual Demand Duration [hrs] |
|-------------------|-----------------------------------|
| MZ Mozambique     | 8756                              |
| BR Brazil         | 8751                              |
| PY Paraguay       | 8749                              |
| CO Colombia       | 8748                              |
| VE Venezuela      | 8748                              |
| PE Peru           | 8738                              |
| CA Canada         | 8733                              |
| NZ New Zealand    | 8690                              |
| SD Sudan          | 8687                              |
| SE Sweden         | 8547                              |
| GH Ghana          | 8267                              |
| CL Chile          | 7794                              |
| AR Argentina      | 6197                              |
| NG Nigeria        | 5532                              |
| TR Turkey         | 5378                              |
| VN Vietnam        | 5235                              |
| IT Italy          | 4434                              |
| MY Malaysia       | 4426                              |
| ID Indonesia      | 4349                              |
| KR South Korea    | 4134                              |
| ZA South Africa   | 3960                              |
| ES Spain          | 3937                              |
| IN India          | 3916                              |
| CN China          | 3887                              |
| TH Thailand       | 3877                              |
| JP Japan          | 3845                              |
| MX Mexico         | 3820                              |
| TN Tunisia        | 3694                              |
| MA Morocco        | 3655                              |
| IR Iran           | 3631                              |
| SA Saudi Arabia   | 3535                              |
| PL Poland         | 3454                              |
| FR France         | 3440                              |
| EG Egypt          | 3419                              |
| UA Ukraine        | 3385                              |
| RU Russia         | 3339                              |
| AU Australia      | 3284                              |
| DZ Algeria        | 3273                              |
| LY Libya          | 3267                              |
| US United States  | 3221                              |
| DE Germany        | 3155                              |
| GB United Kingdom | 3083                              |

Table 5.2: Curtailed VRE Energy

|                   | Curtailed E [normalized] | Curtailed E [GWh] |
|-------------------|--------------------------|-------------------|
| PE Peru           | 35624                    | 198193            |
| MY Malaysia       | 22407                    | 375000            |
| CO Colombia       | 12286                    | 99763             |
| ID Indonesia      | 11056                    | 312064            |
| VN Vietnam        | 5706                     | 127488            |
| SE Sweden         | 5297                     | 80034             |
| GH Ghana          | 4831                     | 6941              |
| TH Thailand       | 4671                     | 103860            |
| KR South Korea    | 4341                     | 269046            |
| VE Venezuela      | 4308                     | 32093             |
| BR Brazil         | 3798                     | 230325            |
| IN India          | 3768                     | 564567            |
| TR Turkey         | 3367                     | 85851             |
| NG Nigeria        | 3235                     | 9917              |
| MX Mexico         | 3035                     | 100878            |
| IT Italy          | 3029                     | 105902            |
| JP Japan          | 2930                     | 322410            |
| PY Paraguay       | 2852                     | 4079              |
| CL Chile          | 2691                     | 23661             |
| ZA South Africa   | 2578                     | 61286             |
| CN China          | 2506                     | 1845016           |
| ES Spain          | 2372                     | 66982             |
| UA Ukraine        | 2291                     | 33256             |
| IR Iran           | 1978                     | 61287             |
| SA Saudi Arabia   | 1880                     | 70952             |
| NZ New Zealand    | 1851                     | 8554              |
| PL Poland         | 1846                     | 32021             |
| AR Argentina      | 1742                     | 24930             |
| TN Tunisia        | 1700                     | 3073              |
| DE Germany        | 1481                     | 89990             |
| GB United Kingdom | 1459                     | 52230             |
| US United States  | 1242                     | 571633            |
| MA Morocco        | 1232                     | 4415              |
| FR France         | 1222                     | 62955             |
| DZ Algeria        | 1220                     | 8652              |
| CA Canada         | 1168                     | 73867             |
| LY Libya          | 1159                     | 3398              |
| MZ Mozambique     | 1123                     | 1635              |
| AU Australia      | 1108                     | 30214             |
| SD Sudan          | 1096                     | 1611              |
| EG Egypt          | 891                      | 16730             |
| RU Russia         | 828                      | 88038             |

Table 5.3: VRE Total Installed Capacity

|                   | Capacity<br>[normalized] | Capacity<br>[GW] |
|-------------------|--------------------------|------------------|
| MY Malaysia       | 15.22                    | 254.75           |
| PE Peru           | 14.77                    | 82.16            |
| CO Colombia       | 7.68                     | 62.38            |
| ID Indonesia      | 6.61                     | 186.63           |
| SE Sweden         | 5.28                     | 79.80            |
| VN Vietnam        | 4.79                     | 106.96           |
| GH Ghana          | 4.52                     | 6.49             |
| TH Thailand       | 4.49                     | 99.86            |
| KR South Korea    | 4.46                     | 276.57           |
| VE Venezuela      | 3.89                     | 28.97            |
| IT Italy          | 3.78                     | 132.07           |
| NG Nigeria        | 3.55                     | 10.87            |
| IN India          | 3.43                     | 513.68           |
| TR Turkey         | 3.33                     | 84.98            |
| JP Japan          | 3.27                     | 360.28           |
| PY Paraguay       | 3.23                     | 4.63             |
| MX Mexico         | 3.23                     | 107.24           |
| ES Spain          | 3.17                     | 89.41            |
| BR Brazil         | 3.08                     | 186.93           |
| PL Poland         | 3.08                     | 53.44            |
| UA Ukraine        | 3.08                     | 44.68            |
| NZ New Zealand    | 2.94                     | 13.57            |
| DE Germany        | 2.83                     | 171.69           |
| TN Tunisia        | 2.70                     | 4.89             |
| ZA South Africa   | 2.66                     | 63.15            |
| GB United Kingdom | 2.60                     | 93.13            |
| CN China          | 2.54                     | 1869.54          |
| MZ Mozambique     | 2.46                     | 3.59             |
| FR France         | 2.46                     | 126.59           |
| IR Iran           | 2.45                     | 75.99            |
| CL Chile          | 2.43                     | 21.35            |
| SA Saudi Arabia   | 2.38                     | 89.98            |
| CA Canada         | 2.24                     | 141.53           |
| DZ Algeria        | 2.21                     | 15.66            |
| MA Morocco        | 2.20                     | 7.89             |
| US United States  | 2.19                     | 1009.66          |
| AR Argentina      | 2.19                     | 31.34            |
| SD Sudan          | 2.16                     | 3.17             |
| EG Egypt          | 2.05                     | 38.49            |
| RU Russia         | 1.98                     | 210.56           |
| AU Australia      | 1.93                     | 52.69            |
| LY Libya          | 1.92                     | 5.64             |

Table 5.4: Peak Residual Demand

|                   | Peak<br>Demand<br>[normalized] | Peak<br>Demand<br>[GW] |
|-------------------|--------------------------------|------------------------|
| GB United Kingdom | 1.400                          | 50.137                 |
| TN Tunisia        | 1.400                          | 2.530                  |
| DZ Algeria        | 1.394                          | 9.884                  |
| LY Libya          | 1.385                          | 4.061                  |
| JP Japan          | 1.336                          | 147.038                |
| SA Saudi Arabia   | 1.312                          | 49.487                 |
| PL Poland         | 1.291                          | 22.389                 |
| DE Germany        | 1.290                          | 78.365                 |
| TH Thailand       | 1.279                          | 28.446                 |
| MA Morocco        | 1.211                          | 4.340                  |
| EG Egypt          | 1.148                          | 21.564                 |
| IT Italy          | 1.133                          | 39.621                 |
| KR South Korea    | 1.131                          | 70.105                 |
| ZA South Africa   | 1.096                          | 26.047                 |
| US United States  | 1.041                          | 479.385                |
| FR France         | 1.032                          | 53.196                 |
| IR Iran           | 1.032                          | 31.976                 |
| MX Mexico         | 1.028                          | 34.158                 |
| ID Indonesia      | 0.999                          | 28.192                 |
| MY Malaysia       | 0.980                          | 16.397                 |
| UA Ukraine        | 0.977                          | 14.174                 |
| AU Australia      | 0.969                          | 26.425                 |
| ES Spain          | 0.967                          | 27.299                 |
| IN India          | 0.899                          | 134.753                |
| PY Paraguay       | 0.810                          | 1.159                  |
| NG Nigeria        | 0.746                          | 2.287                  |
| CN China          | 0.712                          | 524.187                |
| CA Canada         | 0.705                          | 44.590                 |
| VE Venezuela      | 0.698                          | 5.203                  |
| PE Peru           | 0.673                          | 3.742                  |
| BR Brazil         | 0.618                          | 37.449                 |
| RU Russia         | 0.618                          | 65.645                 |
| CO Colombia       | 0.599                          | 4.865                  |
| TR Turkey         | 0.593                          | 15.129                 |
| AR Argentina      | 0.529                          | 7.568                  |
| CL Chile          | 0.507                          | 4.458                  |
| SE Sweden         | 0.449                          | 6.789                  |
| GH Ghana          | 0.409                          | 0.587                  |
| MZ Mozambique     | 0.406                          | 0.592                  |
| VN Vietnam        | 0.384                          | 8.572                  |
| NZ New Zealand    | 0.165                          | 0.764                  |
| SD Sudan          | 0.152                          | 0.223                  |

Table 5.5: Max Hourly Ramp Up Rate

|                   | Ramp Rate<br>[normalized] | Ramp<br>Rate<br>[GW/hr] |
|-------------------|---------------------------|-------------------------|
| TN Tunisia        | 0.621                     | 1.12                    |
| KR South Korea    | 0.563                     | 34.91                   |
| LY Libya          | 0.550                     | 1.61                    |
| TH Thailand       | 0.519                     | 11.53                   |
| SA Saudi Arabia   | 0.506                     | 19.09                   |
| ZA South Africa   | 0.490                     | 11.65                   |
| DZ Algeria        | 0.475                     | 3.37                    |
| PL Poland         | 0.475                     | 8.24                    |
| GB United Kingdom | 0.467                     | 16.72                   |
| DE Germany        | 0.458                     | 27.81                   |
| IR Iran           | 0.457                     | 14.15                   |
| MY Malaysia       | 0.456                     | 7.63                    |
| EG Egypt          | 0.445                     | 8.36                    |
| JP Japan          | 0.439                     | 48.29                   |
| ID Indonesia      | 0.402                     | 11.34                   |
| IN India          | 0.397                     | 59.42                   |
| MX Mexico         | 0.365                     | 12.15                   |
| US United States  | 0.351                     | 161.57                  |
| MA Morocco        | 0.334                     | 1.20                    |
| IT Italy          | 0.314                     | 10.99                   |
| UA Ukraine        | 0.293                     | 4.25                    |
| NG Nigeria        | 0.280                     | 0.86                    |
| ES Spain          | 0.268                     | 7.57                    |
| AU Australia      | 0.250                     | 6.82                    |
| FR France         | 0.233                     | 12.02                   |
| AR Argentina      | 0.226                     | 3.23                    |
| SE Sweden         | 0.225                     | 3.39                    |
| CN China          | 0.209                     | 153.87                  |
| GH Ghana          | 0.204                     | 0.29                    |
| VN Vietnam        | 0.161                     | 3.60                    |
| CL Chile          | 0.159                     | 1.40                    |
| RU Russia         | 0.089                     | 9.45                    |
| TR Turkey         | 0.078                     | 2.00                    |
| NZ New Zealand    | 0.077                     | 0.36                    |
| SD Sudan          | 0.076                     | 0.11                    |
| PE Peru           | 0.019                     | 0.10                    |
| BR Brazil         | 0.000                     | 0.00                    |
| CA Canada         | 0.000                     | 0.00                    |
| CO Colombia       | 0.000                     | 0.00                    |
| MZ Mozambique     | 0.000                     | 0.00                    |
| PY Paraguay       | 0.000                     | 0.00                    |
| VE Venezuela      | 0.000                     | 0.00                    |

Table 5.6: Max Hourly Ramp Down Rate

|                   | Ramp Rate<br>[normalized] | Ramp<br>Rate<br>[GW/hr] |
|-------------------|---------------------------|-------------------------|
| KR South Korea    | -0.536                    | -33.23                  |
| DE Germany        | -0.510                    | -31.00                  |
| IT Italy          | -0.506                    | -17.69                  |
| PL Poland         | -0.506                    | -8.77                   |
| ZA South Africa   | -0.486                    | -11.55                  |
| ES Spain          | -0.483                    | -13.65                  |
| MX Mexico         | -0.479                    | -15.93                  |
| SA Saudi Arabia   | -0.471                    | -17.77                  |
| TH Thailand       | -0.464                    | -10.31                  |
| MY Malaysia       | -0.435                    | -7.28                   |
| TN Tunisia        | -0.430                    | -0.78                   |
| EG Egypt          | -0.419                    | -7.87                   |
| DZ Algeria        | -0.411                    | -2.91                   |
| CN China          | -0.410                    | -302.05                 |
| UA Ukraine        | -0.405                    | -5.88                   |
| LY Libya          | -0.398                    | -1.17                   |
| AU Australia      | -0.392                    | -10.70                  |
| US United States  | -0.388                    | -178.48                 |
| IN India          | -0.385                    | -57.62                  |
| MA Morocco        | -0.375                    | -1.34                   |
| IR Iran           | -0.369                    | -11.45                  |
| FR France         | -0.358                    | -18.45                  |
| GB United Kingdom | -0.353                    | -12.63                  |
| JP Japan          | -0.332                    | -36.57                  |
| PE Peru           | -0.310                    | -1.73                   |
| TR Turkey         | -0.297                    | -7.56                   |
| ID Indonesia      | -0.284                    | -8.02                   |
| BR Brazil         | -0.267                    | -16.16                  |
| NG Nigeria        | -0.266                    | -0.81                   |
| PY Paraguay       | -0.252                    | -0.36                   |
| SE Sweden         | -0.217                    | -3.28                   |
| MZ Mozambique     | -0.203                    | -0.30                   |
| GH Ghana          | -0.192                    | -0.28                   |
| CL Chile          | -0.192                    | -1.69                   |
| VE Venezuela      | -0.189                    | -1.40                   |
| VN Vietnam        | -0.165                    | -3.69                   |
| RU Russia         | -0.152                    | -16.12                  |
| AR Argentina      | -0.147                    | -2.10                   |
| CO Colombia       | -0.127                    | -1.03                   |
| CA Canada         | -0.123                    | -7.80                   |
| SD Sudan          | -0.076                    | -0.11                   |
| NZ New Zealand    | -0.063                    | -0.29                   |

Table 5.7: Sum of Hourly Ramp Up Rates

|                   | Ramp Rate Sum<br>[normalized] | Ramp Rate Sum<br>[GW/hr] |
|-------------------|-------------------------------|--------------------------|
| LY Libya          | 365                           | 1071                     |
| DZ Algeria        | 337                           | 2386                     |
| TH Thailand       | 320                           | 7109                     |
| TN Tunisia        | 313                           | 567                      |
| EG Egypt          | 302                           | 5678                     |
| GB United Kingdom | 270                           | 9670                     |
| ID Indonesia      | 266                           | 7506                     |
| PL Poland         | 265                           | 4590                     |
| ZA South Africa   | 264                           | 6284                     |
| KR South Korea    | 262                           | 16246                    |
| MY Malaysia       | 259                           | 4341                     |
| SA Saudi Arabia   | 258                           | 9748                     |
| MA Morocco        | 257                           | 920                      |
| DE Germany        | 252                           | 15321                    |
| IN India          | 247                           | 36991                    |
| IT Italy          | 246                           | 8584                     |
| MX Mexico         | 243                           | 8065                     |
| IR Iran           | 240                           | 7425                     |
| ES Spain          | 238                           | 6716                     |
| US United States  | 222                           | 102349                   |
| JP Japan          | 214                           | 23592                    |
| AU Australia      | 205                           | 5582                     |
| UA Ukraine        | 202                           | 2932                     |
| FR France         | 180                           | 9271                     |
| NG Nigeria        | 172                           | 527                      |
| CN China          | 153                           | 112446                   |
| RU Russia         | 91                            | 9691                     |
| VN Vietnam        | 73                            | 1626                     |
| TR Turkey         | 71                            | 1810                     |
| GH Ghana          | 26                            | 37                       |
| CL Chile          | 22                            | 196                      |
| AR Argentina      | 19                            | 267                      |
| SE Sweden         | 5                             | 76                       |
| SD Sudan          | 2                             | 3                        |
| NZ New Zealand    | 1                             | 7                        |
| PE Peru           | 0                             | 0                        |
| BR Brazil         | 0                             | 0                        |
| CA Canada         | 0                             | 0                        |
| CO Colombia       | 0                             | 0                        |
| MZ Mozambique     | 0                             | 0                        |
| PY Paraguay       | 0                             | 0                        |
| VE Venezuela      | 0                             | 0                        |

Table 5.8: Sum of Hourly Ramp Down Rates

|                   | Ramp Rate Sum<br>[normalized] | Ramp Rate Sum<br>[GW/hr] |
|-------------------|-------------------------------|--------------------------|
| LY Libya          | -365                          | -1071                    |
| DZ Algeria        | -337                          | -2386                    |
| TH Thailand       | -319                          | -7102                    |
| TN Tunisia        | -313                          | -566                     |
| EG Egypt          | -302                          | -5677                    |
| GB United Kingdom | -270                          | -9671                    |
| ID Indonesia      | -266                          | -7506                    |
| PL Poland         | -265                          | -4590                    |
| ZA South Africa   | -264                          | -6275                    |
| KR South Korea    | -262                          | -16254                   |
| MY Malaysia       | -259                          | -4341                    |
| SA Saudi Arabia   | -258                          | -9743                    |
| MA Morocco        | -257                          | -921                     |
| DE Germany        | -252                          | -15321                   |
| IN India          | -247                          | -37041                   |
| IT Italy          | -246                          | -8590                    |
| MX Mexico         | -243                          | -8085                    |
| IR Iran           | -240                          | -7427                    |
| ES Spain          | -238                          | -6715                    |
| US United States  | -223                          | -102697                  |
| JP Japan          | -214                          | -23592                   |
| AU Australia      | -205                          | -5582                    |
| UA Ukraine        | -202                          | -2935                    |
| FR France         | -179                          | -9247                    |
| NG Nigeria        | -172                          | -527                     |
| CN China          | -153                          | -112923                  |
| RU Russia         | -92                           | -9741                    |
| VN Vietnam        | -73                           | -1626                    |
| TR Turkey         | -72                           | -1824                    |
| GH Ghana          | -26                           | -37                      |
| CL Chile          | -23                           | -200                     |
| AR Argentina      | -19                           | -274                     |
| SE Sweden         | -5                            | -83                      |
| SD Sudan          | -2                            | -3                       |
| NZ New Zealand    | -1                            | -7                       |
| PY Paraguay       | -1                            | -1                       |
| VE Venezuela      | -1                            | -6                       |
| PE Peru           | -1                            | -4                       |
| CA Canada         | -1                            | -45                      |
| BR Brazil         | -1                            | -39                      |
| CO Colombia       | -1                            | -5                       |
| MZ Mozambique     | 0                             | -1                       |
